# Supplementary material for: Normative data for interorbital distance in a pediatric Caucasian population
Source: Research Square preprint supplement (doi:10.21203/rs.3.rs-8206913/v1), 2025-12-09
Supplement: Supplementary file 1 [file 098c76b965182de10ced02c7.docx]

Table 3: Bony inner interorbital distance (IOD) to lateral orbital distance values (LOD) ratio by age group and sex and comparisons between males and females (*).

| **Age group** | **Number of CT-scans per group** | | **Inner Interorbital / Lateral Orbital distances ratio (IOD/LOD ratio)** | | | |
| --- | --- | --- | --- | --- | --- | --- |
|  |  | All (mean +/- SD) | | F (mean +/- SD) | M (mean +/- SD) | p-Value* |
| 3-6 mo | 33 (13F, 20M) | 0.25 +/- 0,01 | | 0.26 | 0.25 | 0.610 |
| 6-12 mo | 45 (19F, 26M) | 0.24 +/- 0,01 | | 0.24 | 0.24 | 0.912 |
| 12-18 mo | 38 (17F, 21M) | 0.24 +/- 0,01 | | 0.24 | 0.24 | 0.881 |
| 18-24 mo | 21 (11F, 10M) | 0.24 +/- 0,02 | | 0.25 | 0.24 | 0.772 |
| 2 y | 39 (16F, 23M) | 0.24 +/- 0,01 | | 0.24 | 0.24 | 0.952 |
| 3 y | 40 (17F, 23M) | 0.24 +/- 0,01 | | 0.24 | 0.24 | 0.944 |
| 4 y | 35 (17F, 18M) | 0.24 +/- 0,01 | | 0.24 | 0.24 | 0.826 |
| 5 y | 35 (17F, 18M) | 0.24 +/- 0,02 | | 0.24 | 0.25 | 0.764 |
| 6 y | 37 (20F, 17M) | 0.24 +/- 0,02 | | 0.25 | 0.24 | 0.834 |
| 7 y | 36 (20F, 16M) | 0.24 +/- 0,01 | | 0.25 | 0.24 | 0.582 |
| 8 y | 33 (15F, 18M) | 0.25 +/- 0,02 | | 0.25 | 0.25 | 0.976 |
| 9 y | 42 (18F, 24M) | 0.25 +/- 0,02 | | 0.24 | 0.25 | 0.653 |
| 10 y | 32 (16F, 16M) | 0.25 +/- 0,02 | | 0.24 | 0.25 | 0.617 |

F = females, M = males, y = years, mo = months.
